# Supplementary material for: Hydrothermal synthesis and selective photocatalytic properties of tetragonal star-like ZrO2 nanostructures
Source: Royal Society of Chemistry journal article supplement (doi:10.1039/c3ce40234g), 2013-01-01
Supplement: c3ce40234g.pdf [file c3ce40234g.pdf]

# Electronic Supplementary Information for

## Hydrothermal synthesis and selectively photocatalytic properties of tetragonal star-like $\text{ZrO}_2$ nanostructures

Zhanxia Shu,<sup>a,b</sup> Xiuling Jiao,<sup>a,\*</sup> and Dairong Chen<sup>a,\*</sup>

<sup>a</sup> School of Chemistry & Chemical Engineering, National Engineering Research Center for Colloidal Materials, Shandong University, Jinan 250100, P. R. China

<sup>b</sup> Department of Applied Chemistry, College of Science, China Agriculture University, Beijing 100193, P. R. China

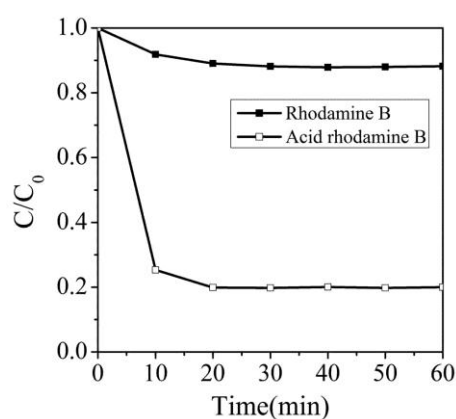

**Fig. S1** The RhB and Acid RhB concentration as a function of keeping time before UV irradiation over tetragonal star-like  $\text{ZrO}_2$  product.

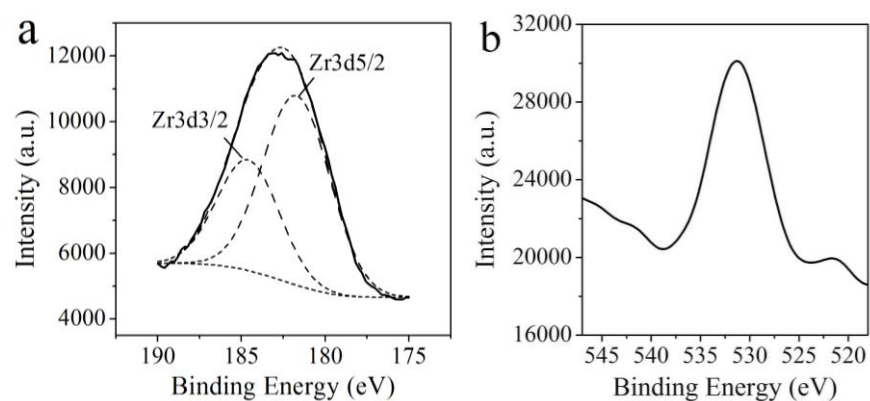

**Fig. S2** XPS spectra of the typical product. (a) Zr3d, (b) O1s.

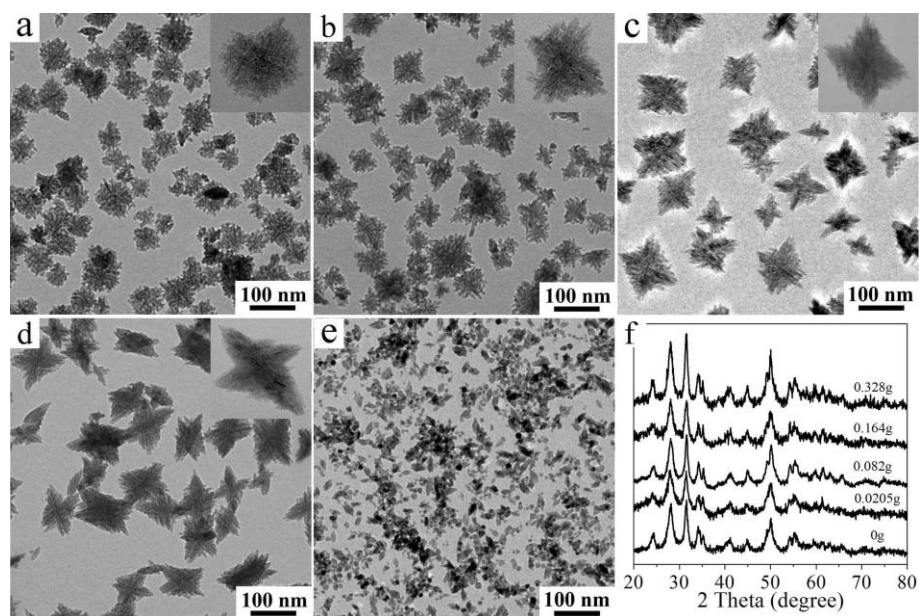

**Fig. S3** TEM images and XRD patterns (f) of the products obtained by reacting at 240 °C for 6 h with different amount of NaAc: (a) 0, (b) 0.0205 g, (c) 0.082 g, (d) 0.164 g, (e) 0.328 g. Insets in a, b, c, d are the corresponding enlarged TEM images.

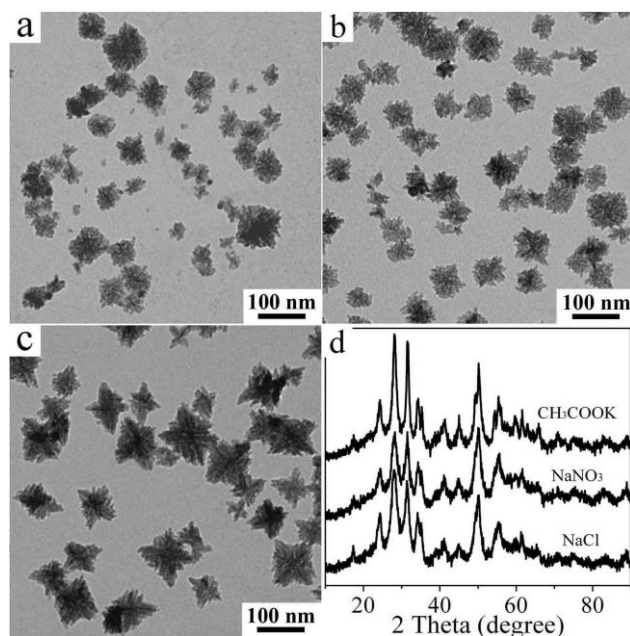

**Fig. S4** TEM images and XRD patterns (d) of the products obtained by reacting at 240 °C for 6 h with different reagents (keeping  $\text{ZrOCl}_2 \cdot 8\text{H}_2\text{O}$  unchanged): (a) NaCl, (b)  $\text{NaNO}_3$ , (c)  $\text{CH}_3\text{COOK}$ .

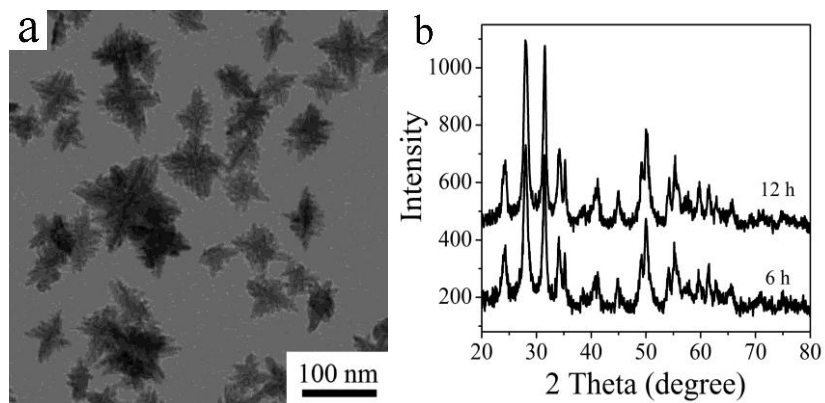

**Fig. S5** The TEM image of the product obtained by 12 h reaction (a) and the XRD patterns of the products obtained by 12 h and 6 h (b).

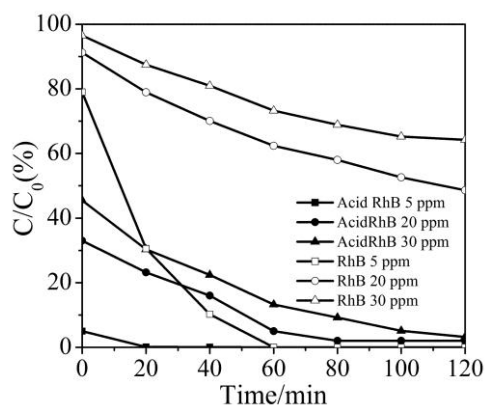

**Fig. S6** Photocatalytic degradation of RhB and Acid RhB with different concentrations.
